1 **Catheter Laboratory Facilities in Indonesia: Number, Growth, and Distribution**  
2 **in The Largest Archipelago Nation**

3  
4 Farizal Rizky Muharram<sup>1</sup>, Andrianto Andrianto<sup>1</sup>, Senitza Anisa Salsabilla<sup>1</sup>, Chaq El Chaq Zamzam  
5 Multazam<sup>1</sup>, Wigaviola Socha Harmadha<sup>1</sup>, Iwan Dakota<sup>2</sup>, Hananto Andriantoro<sup>2</sup>, Doni Firman<sup>2</sup>,  
6 Radityo Prakoso<sup>2</sup>

7  
8 1 Faculty of Medicine, Airlangga University, Soetomo General Hospital, Surabaya, Indonesia

9 2 Department of Cardiology and Vascular Medicine, Faculty of Medicine, University of Indonesia,  
10 National Cardiovascular Centre Harapan Kita, West Jakarta, Indonesia

11  
12 **\*Corresponding Author:** Andrianto, Department of Cardiology and Vascular Medicine, Faculty of  
13 Medicine, Airlangga University, Soetomo General Hospital, Surabaya, Indonesia.

## 14 **Abstract**

15 **Background:** Indonesia, the world's largest archipelago and fourth most populous nation, has  
16 limited transportation due to geographical obstacles. This affects the provision of acute time-  
17 dependent therapy such as Percutaneous Coronary Intervention (PCI). Indonesia's ageing population,  
18 which will increase Acute Coronary Syndrome prevalence in the next decade, will worsen this  
19 problem. Therefore, the analysis and enhancement of cardiovascular care are crucial. The  
20 catheterization laboratory (cath lab) performs PCI procedures. This study maps the number and  
21 distribution of Indonesia's cath lab facilities.

22 **Methods:** A direct survey was used to collect the cath lab location data. Population data came from  
23 the Ministry of Home Affairs. The growth of cath labs is shown and analyzed by region. The ratio  
24 and the Gini index are the primary comparison tools between regions and over time.

25 **Findings:** The number of cath labs in Indonesia significantly increased from 181 to 310 in the last  
26 five years, with 44 of the 119 new labs built in an area that did not have one. Java has the most cath  
27 labs (208, 67%). The cath lab ratio in the provinces of Indonesia ranges from 0.0 in West Papua and  
28 Maluku to 4.46 in Jakarta; the median is 1.09. (IQR 0.71–1.18). The distribution remains a problem,  
29 as shown by the high cath lab Gini index (0.48).

30 **Interpretation** The number of cath labs in Indonesia has increased significantly recently. However,  
31 maldistribution remains a concern. In order to improve Indonesia's cardiovascular emergency  
32 services, Future cath lab development must be planned better by considering the facility accessibility  
33 and density.

34 **Funding:** The study was conducted with the researcher's funds

35  
36 **Keywords:** Acute Coronary Syndrome, Percutaneous Coronary Intervention, Cath lab, Time Travel,  
37 and Geospatial Analysis.

## 39 **Evidence Before Study**

40 Indonesia is the fourth-largest nation by population and the largest archipelagic country.  
41 Unfortunately, the number of cath lab facilities nationwide in Indonesia was never examined or  
42 mentioned in any previous scientific articles that we could find. According to earlier studies, cathlab  
43 accessibility is critical in reducing the time ACS patients take to receive care. It is become crucial to  
44 map cathlab locations and plan them in strategic locations.

## 46 **What this Study Adds**

- 47 • This study provides data on the number of cathlabs, their primary geographic distribution, their  
48 cath lab-to-population ratio, and their evolution over the previous five years in Indonesia.
- 49 • Our research demonstrates that to ensure equity access, Indonesia, as the largest archipelagic  
50 nation, needs government policies that initiate the distribution of cathlabs and the strategic placing  
51 of cathlabs as critical factors.

## 52 **Background**

53 Indonesia has entered a new population growth phase, and its demographic distribution will shift to  
54 an older population in the next ten years. It is estimated that the population will increase by 6–7%

55 from 2020 to 2030, with the elderly population (>45 years old) increasing by up to 30%, a rate four  
56 times greater than that of the general population. This will lead to an increase in the incidence of  
57 cardiovascular disease, particularly acute coronary syndrome.

58 Acute Coronary Syndrome (ACS) is a life-threatening noncommunicable disease. Its effective  
59 treatment depends upon specific and general infrastructure. Specific infrastructure includes health  
60 facilities with specialized equipment (cath lab), and general infrastructure (roads, ambulances,  
61 referral systems) supports access to these facilities. Primary Percutaneous coronary intervention  
62 (PCI) is still the gold standard in treating ACS as evidenced by a reduction in mortality and  
63 morbidity in patients receiving this treatment. However, the efficacy of primary PCI depends upon  
64 symptoms-to-needle and door-to-needle time criteria.<sup>1-3</sup>

65 As one of the world's largest archipelago countries, Indonesia has the burden of a growing  
66 population, and a transportation and access problem. In addition, as an archipelago, the sea is a  
67 barrier between islands, separating their populations and making it harder for health facilities to  
68 cover their people. Access to health facilities needs improved transportation. In this paper, we will  
69 describe the growth, number, ratio, and distribution of cath labs in Indonesia with the expectation of  
70 it providing a basis for policy-making.<sup>4-6</sup>

## 71 **Methods**

### 72 **Conceptual framework**

73 This study is cross-sectional, with geospatial information systems used for the primary analysis. We  
74 gathered the data on the cath lab facilities, road networks, population, and demographic boundaries  
75 and analyzed them using Network Analysis. This study was divided into two phases: The first phase  
76 was data collection, and the second was data analysis. The process will be held in July 2022. In this  
77 research, we focused on the infrastructure aspect, such as the road network and cath lab facility. This  
78 paper does not discuss other factors that may affect the time needed to reach the nearest facility, such  
79 as the cardiac emergency system, human resources available to perform PCI, and the national referral  
80 system [Figure 1].

#### 81 **• Cath lab facility data**

82 Open-source data for cath labs were unavailable; therefore, we conducted a primary survey from  
83 the data of hospital instruments from the Ministry of Health. These data were cross-checked  
84 using a primary survey of the regional heart association data and online data mining sourced  
85 from hospital facilities' websites and news of cath lab openings from trusted media. After the  
86 primary data were finished, the data was cross-checked with the data from the Ministry of  
87 Health, the Indonesian Heart Association, and the Indonesia National Health Insurance. Data that  
88 did not match with our sources, or was ambiguous, was further checked by contacting the  
89 hospital or the regional heart association. The final cath lab data reflects the situation in  
90 Indonesia as of June 2022. Some facilities, especially tertiary and referral hospitals, may have  
91 more than one cath lab. Information on the cath labs in every hospital was unavailable publicly.  
92 As a compromise, we, therefore, counted the number of hospitals that have a cath lab.

93 Existing hospital data was also analyzed temporally based on when the PCI facility started  
94 operating. Data collection ran from February to June 2022. Facilities that opened after data  
95 collection could not be included because of the limited digital data system in Indonesia.

96 **Figure 1.**

97  
98

99 • **Population and Administrative data**

100 The population data were obtained from the geospatial information system (GIS) data of the  
101 Ministry of Internal Affairs. The most recent population estimates were from 30 June 2022. GIS  
102 data contain both population and administrative data. Indonesia's administration level is divided  
103 into three levels: province, district, and subdistrict. Province is the term for the first  
104 administrative level, and Indonesia has 34 provinces. The second administrative levels are  
105 District, that divides into Cities (Kota) and Regencies (Kabupaten). Cities are urban areas with a  
106 high population density and a likely higher socioeconomic status, while regencies are suburban to  
107 rural regions with a lower socioeconomic status. Indonesia had 416 regencies and 98 cities in  
108 2022.

109 In addition, we aggregate health worker data into five islands with the densest population:  
110 Sumatra, Java, Kalimantan, Bali-Nusa, Sulawesi, and Maluku-Papua. The cath labs are also  
111 grouped into public and private hospitals because they serve different target populations. The  
112 public hospital focuses on providing services for all levels of society, whether poor or wealthy.

113

114 **Density and Gini index**

115 To measure and compare the cath lab maldistribution, we compared the density of the cathlab  
116 between areas and used Gini index as inequality measurement. The density was defined as the  
117 number of cath labs per population within the same area. The Gini index is a widely recognized  
118 measure of economic and healthcare inequality. We were comparing Gini index of cathlab at  
119 provincial level Gini Index ranges from 0 to 1, with greater values indicating greater levels of  
120 inequality. UNICEF define Gini index as <0.2 corresponds to ideal income equality, 0.2–0.3  
121 corresponds to relative equality, 0.3–0.4 corresponds to a substantial income gap, 0.4–0.5  
122 corresponds to a high-income disparity, and above 0.5 corresponds to severe income inequality. The  
123 Gini index was calculated using R in RStudio, “dineq” Package by René Schulenberg.<sup>7</sup>

124

125 **Results**

126

**Figure 2.**

127 **Cath lab growth**

128 The number of cath labs in Indonesia increased significantly from 2017 to 2022. Within six years,  
129 129 new cath lab facilities were added. Increasing the total cath labs from 181 to 310 further  
130 contributed to 71.3% of the total cath lab growth. The owner distribution of the cath lab is still  
131 dominated by private hospitals, which own 54% of the facilities. In the last six years, 62 private  
132 hospitals have new cath labs, whereas public hospitals added 67 [Table 1].

133

134

**Table 1.**

135

136 In 2018 and 2019, the Growth Rate was up to 33 cath labs per year. When the COVID pandemic  
137 occurred, the cath lab growth in Indonesia decreased, dropping to 19 cath labs in 2020 and 21 in  
138 2021. In 2022, we saw an upward trend, with 16 new cath labs opening in the first half of 2022. Java  
139 Island still dominates cath lab growth contributing 81 new facilities (62.3% of the total cath labs).  
140 Followed by Sumatra with 26 new cath labs (20%), Kalimantan with 10 (7.7%), and Sulawesi with  
141 nine (6.9%). There have been no new cath labs in Papua, Bali, and Nusa in the past six years [Table  
142 1].

143

### Table 2.

144

145 Table 2 shows that within five years, there were 44 new cath labs in districts previously without one.  
146 That is, one-third of the new cath labs were built in districts that did not have one. This increased the  
147 districts covered by cath labs from 83 to 113 (21.9% of the total districts). Public-owned hospitals  
148 made up the majority of new cath labs in these areas, with 31 of the 44 cath labs. Most of the new  
149 cath labs in new districts were built in 2018. After that, the number of cath lab additions in new areas  
150 decreased.

151

### Table 3.

152

#### The density of Hospitals with cath labs and cardiologists at the subnational level

153  
154 In Java, there are 981 cardiologists and 208 cath labs, the highest levels in Indonesia. Sumatra Island  
155 follows this with 216 cardiologists and 56 cath labs. Sulawesi Island has 107 cardiologists and 18  
156 cath labs, while Kalimantan Island, Bali, Lesser Sunda, Maluku, and Papua are almost 50% lower.  
157 Kalimantan has 60 and 16, Bali, 52 and 5, and Lesser Sunda 18 and 4 cardiologists and cath labs,  
158 respectively. The lowest numbers are in Maluku, which only has six and two, and Papua, with four  
159 and one cardiologists and cath labs, respectively [Table 3].  
160

161

### Figure 3.

162

163

#### Cardiologist and Hospital with cath lab distribution

164  
165 Table 3 shows the number of cardiologists by province. DKI Jakarta has the highest number of  
166 cardiologists, with 327, followed by East Java with 229 and West Java with 209. The lowest number  
167 is in the provinces of West Papua and North Maluku, with two cardiologists each, followed by  
168 Central Sulawesi with three and Maluku with four. The highest density of cardiologists in  
169 Indonesia's islands is found in Bali, with 12.1 cardiologist per million, followed by Java Island with  
170 6.47 and Sulawesi with 5.43. According to the density of cardiologists, DKI Jakarta has the most  
171 with 29.2, followed by West Sulawesi with 18.7 and DI Jogjakarta with 13.1. Central Sulawesi has  
172 one cardiologist, Papua has 0.9, and NTT has 0.6 for the lowest density.  
173

174

### Table 4.

175

176 Regarding cath labs, Java, Bali, and Sumatra have the greatest densities of 1.37, 1.17, and 0.96,  
177 respectively. The province with the highest cath lab density is DKI Jakarta, with 4.46 cath labs per  
178 million, North Kalimantan came in second with 2.93, and The Riau Island came in third with 1.99.  
179 The lowest values were recorded in East Lesser Sunda (0.19 cath lab per million), Papua (0.23),  
180 West Papua (0), and North Maluku (0).  
181

182

### Figure 4.

183

## Discussion

184

### ACS treatment in LMIC

185 According to the Indonesia Basic Health Research General Statistics, ACS numbers are increasing  
186 dramatically in all provinces, with up to 90% increase in prevalence within ten years. The number  
187 will continue to rise as the Indonesian population ages. In the next ten years, one-third of the  
188 population will be aged over 45, resulting in a higher prevalence of ACS.<sup>8</sup> In low-and middle-income  
189 countries (LMICs), ST-elevation myocardial infarction (STEMI) is one of the most prevalent

190 presentations of ACS. Over 60% of hospitalizations for ACS are due to STEMI in India, and 80% in  
191 China<sup>9–12</sup>

192 ACS, particularly STEMI, requires prompt intervention and coordination of systems. Creating  
193 efficient systems in resource-constrained contexts is challenging. Successful solutions from more  
194 developed countries cannot simply be transferred. The challenges include a lack of accessible PCI  
195 facilities in urban areas, a shortage of specialists, and inadequate emergency medical services. These  
196 structural issues hinder timely and effective care for ACS patients. Indonesia is lagging in this  
197 respect, and cath lab utilization is suboptimal. Often, the 24-hour service is unavailable, and  
198 providers do not respond quickly to cardiac emergencies. Most LMICs in the Southeast Asian  
199 Region, especially Indonesia, only provide 24-hour rescue or primary PCI at the tertiary or national  
200 level.<sup>6,8</sup>

201 A study in Jakarta, the capital of Indonesia, found that between 2007 and 2013, PCI procedures  
202 increased from 24% to 35%, and non-reperfusion patients decreased from 67·1% to 62·8%.  
203 Maintaining the expansion of PCI procedures is important as the overall STEMI mortality rate has  
204 decreased from 11·7% to 7·5%. Increased cath lab usage indicates progress. However, the problems  
205 in other regions of Indonesia are unquestionably worse than in the capital. Especially in regions with  
206 no cath labs or where their number and accessibility are limited.<sup>13,14</sup>

### 207 **Number and growth of cath labs in Indonesia**

208 In the last five years, the number of cath labs built in Indonesia has increased by up to 40%. This  
209 impressive progress is good preparation for the population shift expected in the next ten years.  
210 However, the pandemic slowed cath lab growth by up to 50% in 2020 and 2021. This is  
211 understandable, but as a result, the Ministry of Health must accelerate cath lab growth over the next  
212 decade to meet demand. Java Island has 81 new cath laboratories, two-thirds of the total. Sumatra  
213 Island has 26. Papua Island has one cath lab and has not had a new one in five years. According to  
214 “The Inverse Care Law,” good medical or social care availability varies inversely with population  
215 requirements. The province of West Java, with 53, has the most cath labs in Indonesia, but this is  
216 only 1·12 cath labs per million population. EAPCI recommends one cath lab per 500,000–600,000  
217 people or 1·67–2 cath labs per one million. Indonesia’s cath lab ratio grew from 0·68 to 1·14 per  
218 million people, but her 272 million population needs at least 450 cath labs to meet the  
219 recommendations.

220 The other concern is 24-hour cath lab services, which remain low in Indonesia. We could not extract  
221 the data of facilities that can perform PCI around the clock. EAPCI’s previous study shows other  
222 countries’ levels of 24-hour service. The lowest rate was in Egypt (0·2 per million), to the highest in  
223 Poland and Belgium (>4 per million). Only a few hospitals in Egypt had catheterization laboratories  
224 that offer 24-hour cardiac emergency care, ensuring low rates of primary PCI and structural cardiac  
225 interventions in Egypt.<sup>15</sup> In 2014, Jakarta had only one national referral hospital that provided 24-  
226 hour service for primary PCI covered by national health insurance. The amount of data of Hospitals  
227 that can handle PCI round the clock is limited. These may be important factors to consider when  
228 developing the STEMI network system as a government insurance system must be implemented in  
229 hospitals that provide PCI services<sup>18</sup>.

### 230 **Distribution of cath labs in Indonesia**

231 We compared the ratio between regions and the Lorenz curve with the Gini index to measure  
232 maldistribution (Figure 4). The density of cath labs in Indonesia ranges from 0·0 in West Papua and  
233 Maluku to 4·46 in Jakarta; the median is 1·09. (IQR 0·71–1·18). The wide range of densities shows  
234 area disparities. The wide range of ratios is in concordance with Gini Index. Our Analysis shows that

235 the Gini index in 2022 was 0.48. This indicates a huge national disparity. The Gini index decreased  
236 in 2022 compared to 2017, falling from 0.54 to 0.48. Despite a significant increase in cath labs, the  
237 small change in the Gini index shows that new cath labs are still concentrated in old cath lab areas.

238 Public and private hospitals in Indonesia increased cath lab distribution and coverage. Private  
239 hospitals own 54% of the cath labs. Public hospitals dominated the provision of first cath labs in the  
240 new area. Private hospitals added more cath labs than public hospitals overall, but public hospitals  
241 own 31 of the 44 in new areas. Private hospitals often build a cath lab in an area with an existing lab.  
242 Building a new cath lab in an area without one is a priority because it will cover more areas. The  
243 Ministry of Health advises central and regional public hospitals and maintains a high cath lab ratio.

#### 244 **Cath lab with insurance coverage**

245 ACS is a catastrophic and expensive disease, typically costing \$ 3,000–\$ 4,000. As most people in  
246 Indonesia are in the middle- to low-income bracket, health insurance is crucial for providing access  
247 to cath lab therapy. According to our findings, only 139 cath labs out of 310 (44.8%) have partnered  
248 with the national health insurance provider. Even if a hospital has a cath lab, patients are less likely  
249 to use one that has not cooperated with insurance.

250

### 251 **RECOMMENDATION**

#### 252 **Policy making for cath lab procurement.**

253 Increasing cath lab capacity will improve the outcome for patients. The high Indonesian ACS  
254 mortality increases the importance of procuring more cath labs. We can learn from Poland, where  
255 cath lab referral services developed five to ten years ago. Poland increased its STEMI patient  
256 treatment capacity to more than 16 more advanced European countries<sup>15</sup>. The study also shows that  
257 the number of cath labs does not correlate with economic conditions. Greece, with a smaller  
258 economy than Denmark, has more cath labs. This shows the importance of the government as a  
259 regulator of policy and decision-making in the procurement of cath labs. Increasing resources  
260 requires managing procurement effectiveness and efficiency.<sup>15,19</sup>

#### 261 **Cath lab mapping**

262 Indonesia must continuously monitor and report using a dashboard system to map the hospitals with  
263 cath labs. It can then provide information on how the cath labs are distributed, whether they can do  
264 PCIs with their Interventionist and whether they are covered by insurance. Several concerns require  
265 systematic investigation. There are information gaps in health services research. Precise mapping of  
266 the percentage of the population that can already reach existing thrombolytic/PCI in less than 2 hours  
267 would be extremely useful for planning new resources. Such information is mainly unavailable.  
268 Geospatial analysis in Russia shows promising results by showing the percentage of the population  
269 that can access cath labs promptly and areas that still need a cath lab. Further study of Indonesia cath  
270 lab coverage mapping is also required.<sup>18–21</sup>

#### 271 **Cath lab monitoring**

272 We need to monitor other factors that influence the PCI process at the hospital level. The impact of  
273 new programs on patient outcomes and healthcare expenditures should be studied so that the  
274 regulator can evaluate cath lab programs.<sup>22</sup> Cath lab regulatory policy needs better data on cath lab  
275 capacity in local regions. Regionalized care includes community-wide planning for PCI distribution,  
276 emergency programs to diagnose and refer patients to PCI facilities, and regional patient transfer  
277 agreements between hospitals.<sup>25,26</sup>

278 **Further research**

279 Further research may answer questions such as how many people are covered by existing cath labs,  
280 how new cath lab procurement influences treatment capacity, service utilization, healthcare outcome  
281 and costs, and the optimum placement of new cath labs to cover more population.

282 **Limitations**

283 This study only examines the existence of the cath lab infrastructure, not whether the cath lab can  
284 provide services. Further, we could not investigate patient outcomes because we lacked patient-level  
285 data.

286 **Conclusions**

287 Indonesian ACS treatment is susceptible to its low cathlab density. There is also significant  
288 maldistribution, accumulating at several loci. Increasing the number and distribution of cath labs  
289 with strategic placement is needed to increase the capacity of emergency cardiovascular services in  
290 Indonesia.

291 **Acknowledgements**

292 We are grateful to Basuni M.D., and Isman Firdaus M.D. for their time and advice in writing this  
293 study.

294  
295 **Financial Support or Funding:** The study was conducted with the researcher's funds.  
296

297 **Availability of Data and Materials:** Data are available by requesting an application through email  
298 to the corresponding author.  
299

300 **Declaration of interests**

301 The authors declare that they have no known competing financial interests or personal relationships  
302 that could have appeared to influence the work reported in this paper.

303

304



## 305 References

- 306 1. Gabb G, Arnolda L. Geographic location as a modifiable cardiac risk factor. *CMAJ : Canadian*  
307 *Medical Association Journal* [Internet]. 2017 Apr 4 [cited 2022 Jun 20];189(13):E482.  
308 Available from: [/pmc/articles/PMC5378507/](https://pubmed.ncbi.nlm.nih.gov/35378507/)
- 309 2. Tu J v., Chu A, Maclagan L, Austin PC, Johnston S, Ko DT, et al. Regional variations in  
310 ambulatory care and incidence of cardiovascular events. *CMAJ*. 2017 Apr 3;189(13):E494–  
311 501.
- 312 3. Neumann FJ, Sousa-Uva M, Ahlsson A, Alfonso F, Banning AP, Benedetto U, et al. 2018  
313 ESC/EACTS Guidelines on myocardial revascularization. *Eur Heart J*. 2019 Jan 7;40(2):87–  
314 165.
- 315 4. Nakayama A, Nagayama M, Morita H, Kawahara T, Komuro I, Isobe M. The use of  
316 geographical analysis in assessing the impact of patients' home addresses on their  
317 participation in outpatient cardiac rehabilitation: a prospective cohort study. *Environ Health*  
318 *Prev Med* [Internet]. 2020 Dec 1 [cited 2022 Jun 20];25(1):76. Available from:  
319 [/pmc/articles/PMC7699017/](https://pubmed.ncbi.nlm.nih.gov/37699017/)
- 320 5. Fradelos E, Papathanasiou I, Mitsi D, Tsaras K, Kleisiaris C, Kourkouta L. Health Based  
321 Geographic Information Systems (GIS) and their Applications. *Acta Informatica Medica*  
322 [Internet]. 2014 [cited 2022 Jun 20];22(6):402. Available from:  
323 <http://www.scopemed.org/fulltextpdf.php?mno=175415>
- 324 6. Qanitha A, Qalby N, Amir M, Uiterwaal CSPM, Henriques JPS, de Mol BAJM, et al. Clinical  
325 Cardiology in South East Asia: Indonesian Lessons from the Present towards Improvement.  
326 *Glob Heart* [Internet]. 2022 Sep 13 [cited 2022 Nov 24];17(1):66. Available from:  
327 <http://globalheartjournal.com/articles/10.5334/gh.1133/>
- 328 7. Schulenberg R. dineq: Decomposition of (Income) Inequality [Internet]. 2018. Available  
329 from: <https://CRAN.R-project.org/package=dineq>
- 330 8. Dharma S, Andriantoro H, Dakota I, Purnawan I, Pratama V, Isnaniyah H, et al. Organisation  
331 of reperfusion therapy for STEMI in a developing country. *Open Heart*. 2015  
332 May;2(1):e000240.
- 333 9. Li J, Li X, Wang Q, Hu S, Wang Y, Masoudi FA, et al. ST-segment elevation myocardial  
334 infarction in China from 2001 to 2011 (the China PEACE-Retrospective Acute Myocardial  
335 Infarction Study): A retrospective analysis of hospital data. *The Lancet* [Internet]. 2015 Jan 31  
336 [cited 2022 Dec 1];385(9966):441–51. Available from:  
337 <http://www.thelancet.com/article/S0140673614609211/fulltext>
- 338 10. Murugiah K, Nuti S v., Krumholz HM. STEMI Care in LMIC – Obstacles and Opportunities.  
339 *Glob Heart* [Internet]. 2014 Dec 1 [cited 2022 Dec 1];9(4):429. Available from:  
340 [/pmc/articles/PMC5459383/](https://pubmed.ncbi.nlm.nih.gov/25459383/)
- 341 11. Trerayapiwat K, Jinatongthai P, Vathesatogkit P, Sritara P, Paengsai N, Dilokthornsakul P, et  
342 al. Using real world evidence to generate cost-effectiveness analysis of fibrinolytic therapy in  
343 patients with ST-segment elevation myocardial infarction in Thailand. *Lancet Reg Health*  
344 *West Pac* [Internet]. 2022 Sep 1 [cited 2023 Jan 29];26:100503. Available from:  
345 <http://www.thelancet.com/article/S2666606522001183/fulltext>
- 346 12. Callanta MLJ, Cando LFT, Ceriales JA, Punzalan FER, Tantengco OAG. Geographical and  
347 socioeconomic disparities in the use of percutaneous coronary intervention in the Philippines.  
348 *Lancet Reg Health West Pac* [Internet]. 2022 May 1 [cited 2023 Jan 29];22:100477. Available  
349 from: <http://www.thelancet.com/article/S266660652200092X/fulltext>
- 350 13. Subban V, Lakshmanan A, Victor SM, Pakshirajan B, Udayakumaran K, Gnanaraj A, et al.  
351 Outcome of primary PCI-An Indian tertiary care center experience. *Indian Heart J*.  
352 2014;66(1):25–30.

- 353 14. Subban V, Gnanaraj A, Gomathi B, Janakiraman E, Pandurangi U, Kalidoss L, et al.  
354 Percutaneous coronary intervention in cardiogenic shock complicating acute ST-elevation  
355 myocardial infarction-a single centre experience. *Indian Heart J.* 2012;64(2):152–8.
- 356 15. Barbato E, Noc M, Baumbach A, Dudek D, Bunc M, Skolidis E, et al. Mapping interventional  
357 cardiology in Europe: the European Association of Percutaneous Cardiovascular Interventions  
358 (EAPCI) Atlas Project. *Eur Heart J* [Internet]. 2020 Jul 14 [cited 2022 Jun 20];41(27):2579–  
359 88. Available from: <https://academic.oup.com/eurheartj/article/41/27/2579/5862541>
- 360 16. Widimsky P, Fajadet J, Danchin N, Wijns W. “Stent 4 Life” Targeting PCI at all who will  
361 benefit the most A joint project between EAPCI, Euro-PCR, EUCOMED and the ESC  
362 Working Group on Acute Cardiac Care Why “Stent 4 Life”? [cited 2022 Dec 1]; Available  
363 from: <http://www.orderline.dh.gov.uk>
- 364 17. Januš B, Rakowski T, Dziewierz A, Fijorek K, Sokołowski A, Dudek D. Effect of introducing  
365 a regional 24/7 primary percutaneous coronary intervention service network on treatment  
366 outcomes in patients with ST segment elevation myocardial infarction. *Kardiol Pol* [Internet].  
367 2015 [cited 2022 Dec 1];73(5):323–30. Available from:  
368 <https://pubmed.ncbi.nlm.nih.gov/25428812/>
- 369 18. Topol EJ, Kereiakes DJ. Regionalization of care for acute ischemic heart disease: A call for  
370 specialized centers. *Circulation* [Internet]. 2003 Mar 25 [cited 2022 Dec 1];107(11):1463–6.  
371 Available from: <https://www.ahajournals.org/doi/abs/10.1161/01.CIR.0000063680.45780.A0>
- 372 19. Jacobs AK. Regionalized care for patients with ST-elevation myocardial infarction: It’s closer  
373 than you think. *Circulation* [Internet]. 2006 Mar 7 [cited 2022 Dec 1];113(9):1159–61.  
374 Available from:  
375 <https://www.ahajournals.org/doi/abs/10.1161/CIRCULATIONAHA.105.610345>
- 376 20. Jacobs AK, Antman EM, Faxon DP, Gregory T, Solis P. Development of Systems of Care for  
377 ST-Elevation Myocardial Infarction Patients. *Circulation* [Internet]. 2007 Jul 10 [cited 2022  
378 Dec 1];116(2):217–30. Available from:  
379 <https://www.ahajournals.org/doi/abs/10.1161/CIRCULATIONAHA.107.184043>
- 380 21. Chandrashekhar Y, Alexander T, Mulasari A, Kumbhani DJ, Alam S, Alexanderson E, et al.  
381 Resource and infrastructure-appropriate management of ST-segment elevation myocardial  
382 infarction in low- And middle-income countries. *Circulation* [Internet]. 2020 Jun 16 [cited  
383 2022 Dec 1];141:2004–25. Available from:  
384 <https://www.ahajournals.org/doi/abs/10.1161/CIRCULATIONAHA.119.041297>
- 385 22. Concannon TW, Nelson J, Goetz J, Griffith JL. Original Articles A Percutaneous Coronary  
386 Intervention Lab in Every Hospital? 2011; Available from:  
387 <http://circoutcomes.ahajournals.org/lookup/suppl/doi:10.1161/>  
388  
389

390 **Figure and Table**

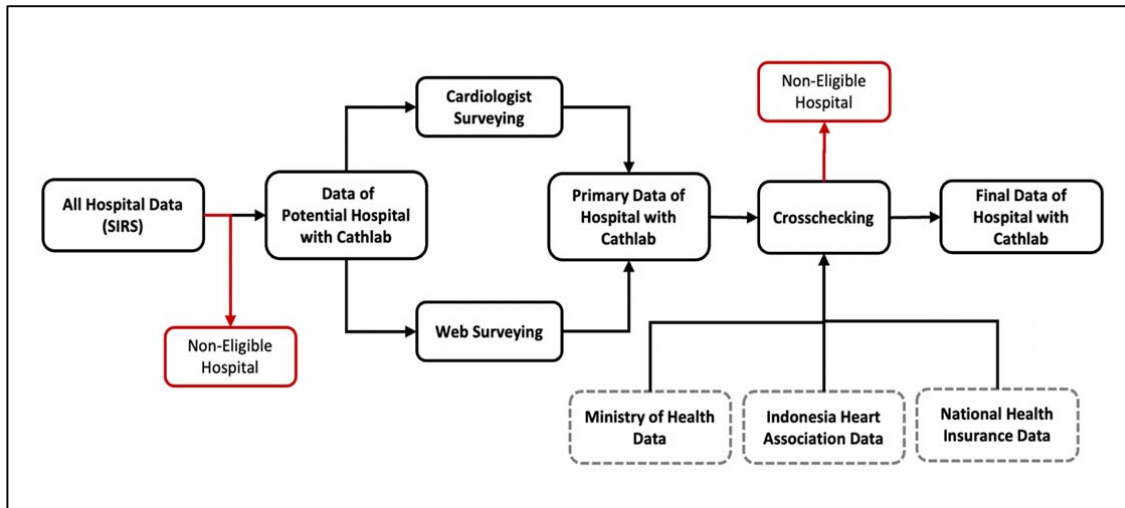

**Figure 1.** Cath lab data collecting process.

391  
392

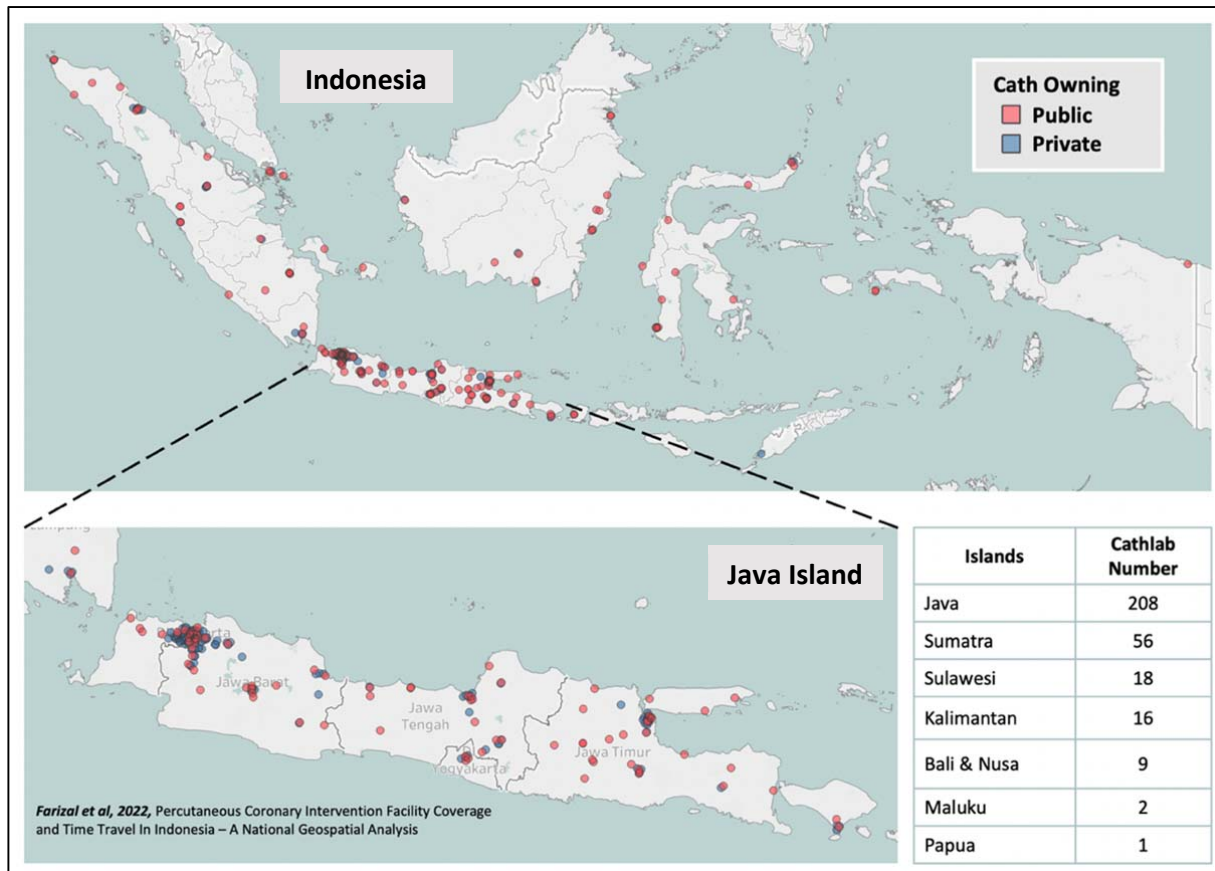

**Figure 2.** The map of Indonesia cath lab distribution, the red dot represents cath lab owned by public hospitals, and blue by private hospitals. The table in lower right shows the distribution between the major islands in Indonesia.

393  
394

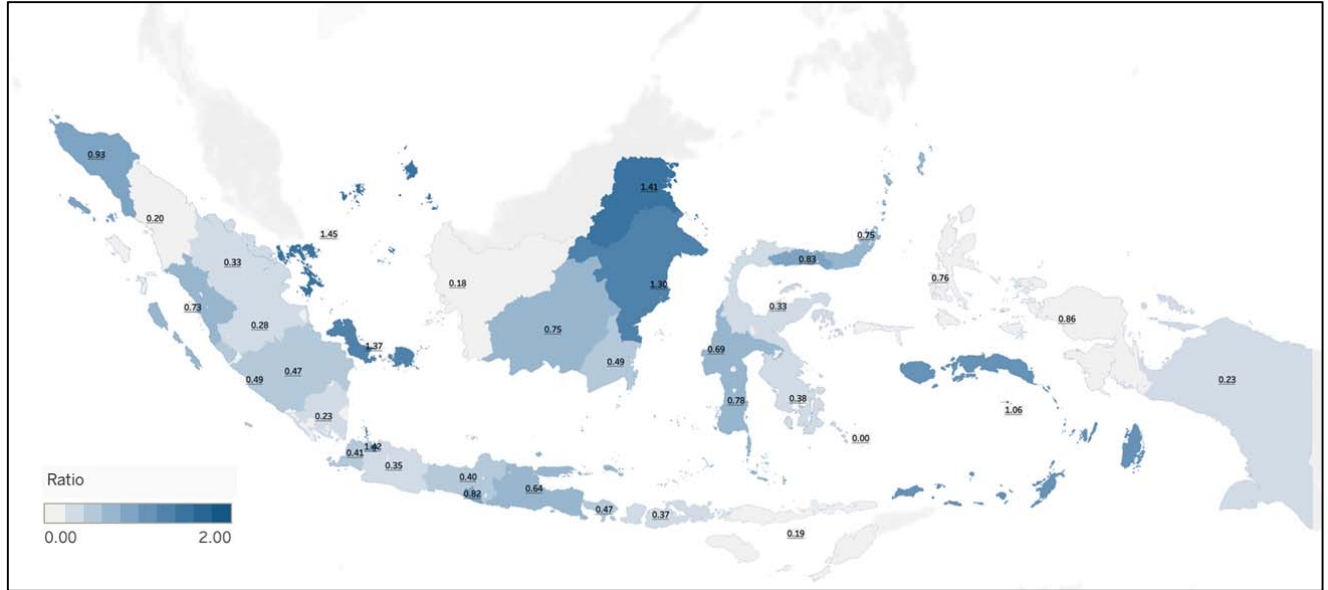

395 **Figure 3. The density of Cathlab per Population in Indonesia**

396

397

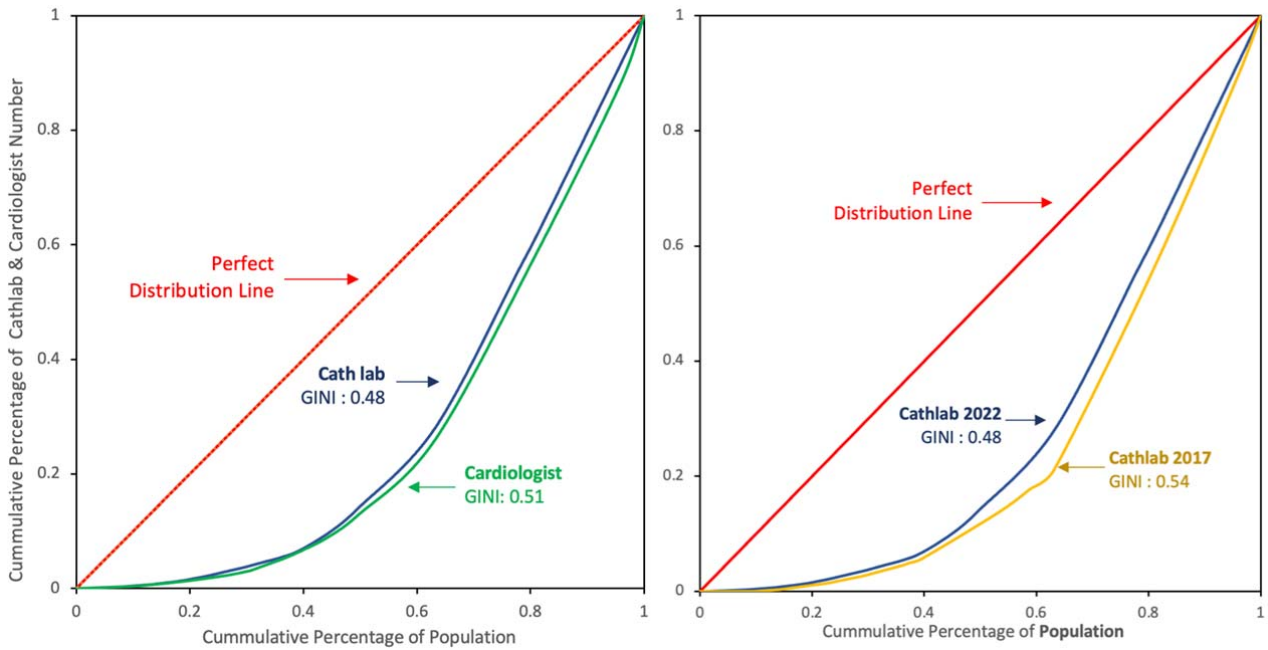

398

399

400

**Figure 4** The Lorenz Curve and Gini index of the cath lab and cardiologist distribution,

**Table 1. Indonesia Hospital with cath lab growth from 2017 to 2022**

| Group/Region                      | Year   |              |              |              |              | Half 2022    | Percentage % |
|-----------------------------------|--------|--------------|--------------|--------------|--------------|--------------|--------------|
|                                   | <=2017 | 2018         | 2019         | 2020         | 2021         |              |              |
| <b>Cath lab number (Growth)</b>   | 181    | 221<br>(+40) | 254<br>(+33) | 273<br>(+19) | 294<br>(+21) | 310<br>(+16) | 100%         |
| <b>National insurance-covered</b> | 87     | 108<br>(+21) | 120<br>(+12) | 129<br>(+9)  | 135<br>(+6)  | 139<br>(+4)  | 44·80%       |
| <b>OWNER GROUPING</b>             |        |              |              |              |              |              |              |
| Public-owned                      | 80     | 99<br>(+19)  | 115<br>(+16) | 125<br>(+10) | 134<br>(+9)  | 142<br>(+8)  | 45·80%       |
| Private-owned                     | 101    | 122<br>(+21) | 139<br>(+17) | 148<br>(+9)  | 160<br>(+12) | 168<br>(+8)  | 54·20%       |
| <b>ISLAND GROUP</b>               |        |              |              |              |              |              |              |
| Bali Nusa                         | 8      | 8            | 8            | 8            | 8            | 9<br>(+1)    | 2·90%        |
| Java                              | 127    | 159<br>(+32) | 178<br>(+19) | 188<br>(+10) | 201<br>(+13) | 208<br>(+7)  | 67·10%       |
| Kalimantan                        | 6      | 7<br>(+1)    | 11<br>(+4)   | 14<br>(+3)   | 15<br>(+1)   | 16<br>(+1)   | 5·16%        |
| Maluku                            | 1      | 1            | 1            | 1            | 2<br>(+1)    | 2            | 0·65%        |
| Papua                             | 1      | 1            | 1            | 1            | 1            | 1            | 0·32%        |
| Sulawesi                          | 9      | 10<br>(+1)   | 13<br>(+3)   | 14<br>(+1)   | 14           | 18<br>(+4)   | 5·81%        |
| Sumatra                           | 30     | 36<br>(+6)   | 43<br>(+7)   | 47<br>(+4)   | 53<br>(+6)   | 56<br>(+3)   | 18·06%       |

401  
402  
403

**Table 2. The Distribution of new Hospital with cath labs in districts that did not have one**

| Hospital Owner          | Additional Cathlab per Year |           |           |            |            | Grand Total |
|-------------------------|-----------------------------|-----------|-----------|------------|------------|-------------|
|                         | 2018                        | 2019      | 2020      | 2021       | 2022       |             |
| Public                  | +9                          | +7        | +5        | +4         | +6         | 31          |
| Private                 | +5                          | +1        | +3        | +2         | +2         | 13          |
| Total                   | +14                         | +8        | +8        | +6         | +8         | 44          |
| <b>District-covered</b> | <b>83</b>                   | <b>91</b> | <b>99</b> | <b>105</b> | <b>113</b> |             |

404  
405  
406  
407

**Table 3. The distribution of Indonesian cath labs and cardiologists within major islands and provinces**

| Island and Province    | Population         | Number       |            | Density (per million) |             |
|------------------------|--------------------|--------------|------------|-----------------------|-------------|
|                        |                    | Cardiologist | Cath       | Cardiologist          | Cath        |
| <b>National</b>        | 269,648,234        | 1,446        | 310        | 5.36                  | 1.15        |
| <b>Lesser Sunda</b>    | <b>10,713,122</b>  | <b>18</b>    | <b>4</b>   | <b>1.68</b>           | <b>0.37</b> |
| West Nusa Tenggara     | 5,308,887          | 15           | 3          | 2.8                   | 0.57        |
| East Nusa Tenggara     | 5,404,235          | 3            | 1          | 0.6                   | 0.19        |
| <b>Bali</b>            | <b>4,285,815</b>   | <b>52</b>    | <b>5</b>   | <b>12.1</b>           | <b>1.17</b> |
| <b>Java</b>            | <b>151,629,504</b> | <b>981</b>   | <b>208</b> | <b>6.47</b>           | <b>1.37</b> |
| DKI Jakarta            | 11,207,822         | 327          | 50         | 29.2                  | 4.46        |
| Di Yogyakarta          | 3,671,818          | 48           | 7          | 13.1                  | 1.91        |
| Central Java           | 36,947,166         | 111          | 27         | 3                     | 0.73        |
| West Java              | 47,161,961         | 209          | 53         | 4.4                   | 1.12        |
| East Java              | 41,002,289         | 229          | 49         | 5.6                   | 1.2         |
| Banten                 | 11,638,448         | 57           | 22         | 4.9                   | 1.89        |
| <b>Kalimantan</b>      | <b>16,641,765</b>  | <b>60</b>    | <b>16</b>  | <b>3.61</b>           | <b>0.96</b> |
| North Kalimantan       | 681,766            | 2            | 2          | 2.9                   | 2.93        |
| East Kalimantan        | 3,770,038          | 24           | 6          | 6.4                   | 1.59        |
| West Kalimantan        | 5,475,380          | 17           | 2          | 3.1                   | 0.37        |
| South Kalimantan       | 4,078,949          | 12           | 3          | 2.9                   | 0.74        |
| Central Kalimantan     | 2,635,632          | 5            | 3          | 1.9                   | 1.14        |
| <b>Maluku</b>          | <b>3,167,532</b>   | <b>6</b>     | <b>2</b>   | <b>1.89</b>           | <b>0.63</b> |
| Maluku                 | 1,870,414          | 4            | 2          | 2.1                   | 1.07        |
| Maluku Utara           | 1,297,118          | 2            | 0          | 1.5                   | 0           |
| <b>Papua</b>           | <b>5,419,011</b>   | <b>6</b>     | <b>1</b>   | <b>1.11</b>           | <b>0.18</b> |
| Papua                  | 4,272,391          | 4            | 1          | 0.9                   | 0.23        |
| West Papua             | 1,146,620          | 2            | 0          | 1.7                   | 0           |
| <b>Sulawesi</b>        | <b>19,715,820</b>  | <b>107</b>   | <b>18</b>  | <b>5.43</b>           | <b>0.91</b> |
| Gorontalo              | 1,193,241          | 5            | 1          | 4.2                   | 0.84        |
| Central Sulawesi       | 3,012,499          | 3            | 1          | 1                     | 0.33        |
| North Sulawesi         | 2,657,940          | 26           | 4          | 9.8                   | 1.5         |
| South Sulawesi         | 8,933,926          | 41           | 10         | 4.6                   | 1.12        |
| West Sulawesi          | 1,447,712          | 27           | 1          | 18.7                  | 0.69        |
| Southeast Sulawesi     | 2,470,502          | 5            | 1          | 2                     | 0.4         |
| <b>Sumatra</b>         | <b>58,075,665</b>  | <b>216</b>   | <b>56</b>  | <b>3.72</b>           | <b>0.96</b> |
| Riau Island            | 2,012,496          | 7            | 4          | 3.5                   | 1.99        |
| Lampung                | 9,087,213          | 13           | 6          | 1.4                   | 0.66        |
| Riau                   | 6,015,023          | 16           | 7          | 2.7                   | 1.16        |
| West Sumatra           | 5,448,684          | 41           | 5          | 7.5                   | 0.92        |
| Jambi                  | 3,534,933          | 12           | 2          | 3.4                   | 0.57        |
| Bengkulu               | 2,019,339          | 5            | 1          | 2.5                   | 0.5         |
| Aceh                   | 5,301,202          | 21           | 6          | 4                     | 1.13        |
| South Sumatra          | 8,281,587          | 11           | 7          | 1.3                   | 0.85        |
| North Sumatra          | 14,938,770         | 82           | 16         | 5.5                   | 1.07        |
| Bangka Belitung Island | 1,436,418          | 8            | 2          | 5.6                   | 1.39        |

408

409

**Table 4. Descriptive statistics of cath lab and cardiologist distribution per million population**

| <b>National Ratio</b> | <b>Min</b> | <b>Q1</b> | <b>Median</b> | <b>Mean</b> | <b>Q3</b> | <b>Max</b> | <b>Range</b> | <b>Gini</b> |
|-----------------------|------------|-----------|---------------|-------------|-----------|------------|--------------|-------------|
| Cath lab              | 0          | 0.71      | <b>1.09</b>   | <b>1.15</b> | 1.18      | 4.46       | <b>4.46</b>  | <b>0.48</b> |
| Cardiologist          | 0.6        | 2.92      | <b>4.29</b>   | <b>5.36</b> | 5.51      | 29.2       | <b>28.2</b>  | <b>0.51</b> |
